# Supplementary material
Source: publisher figshare collection journal article supplement (https://tandf.figshare.com/articles/dataset/_/4829104)

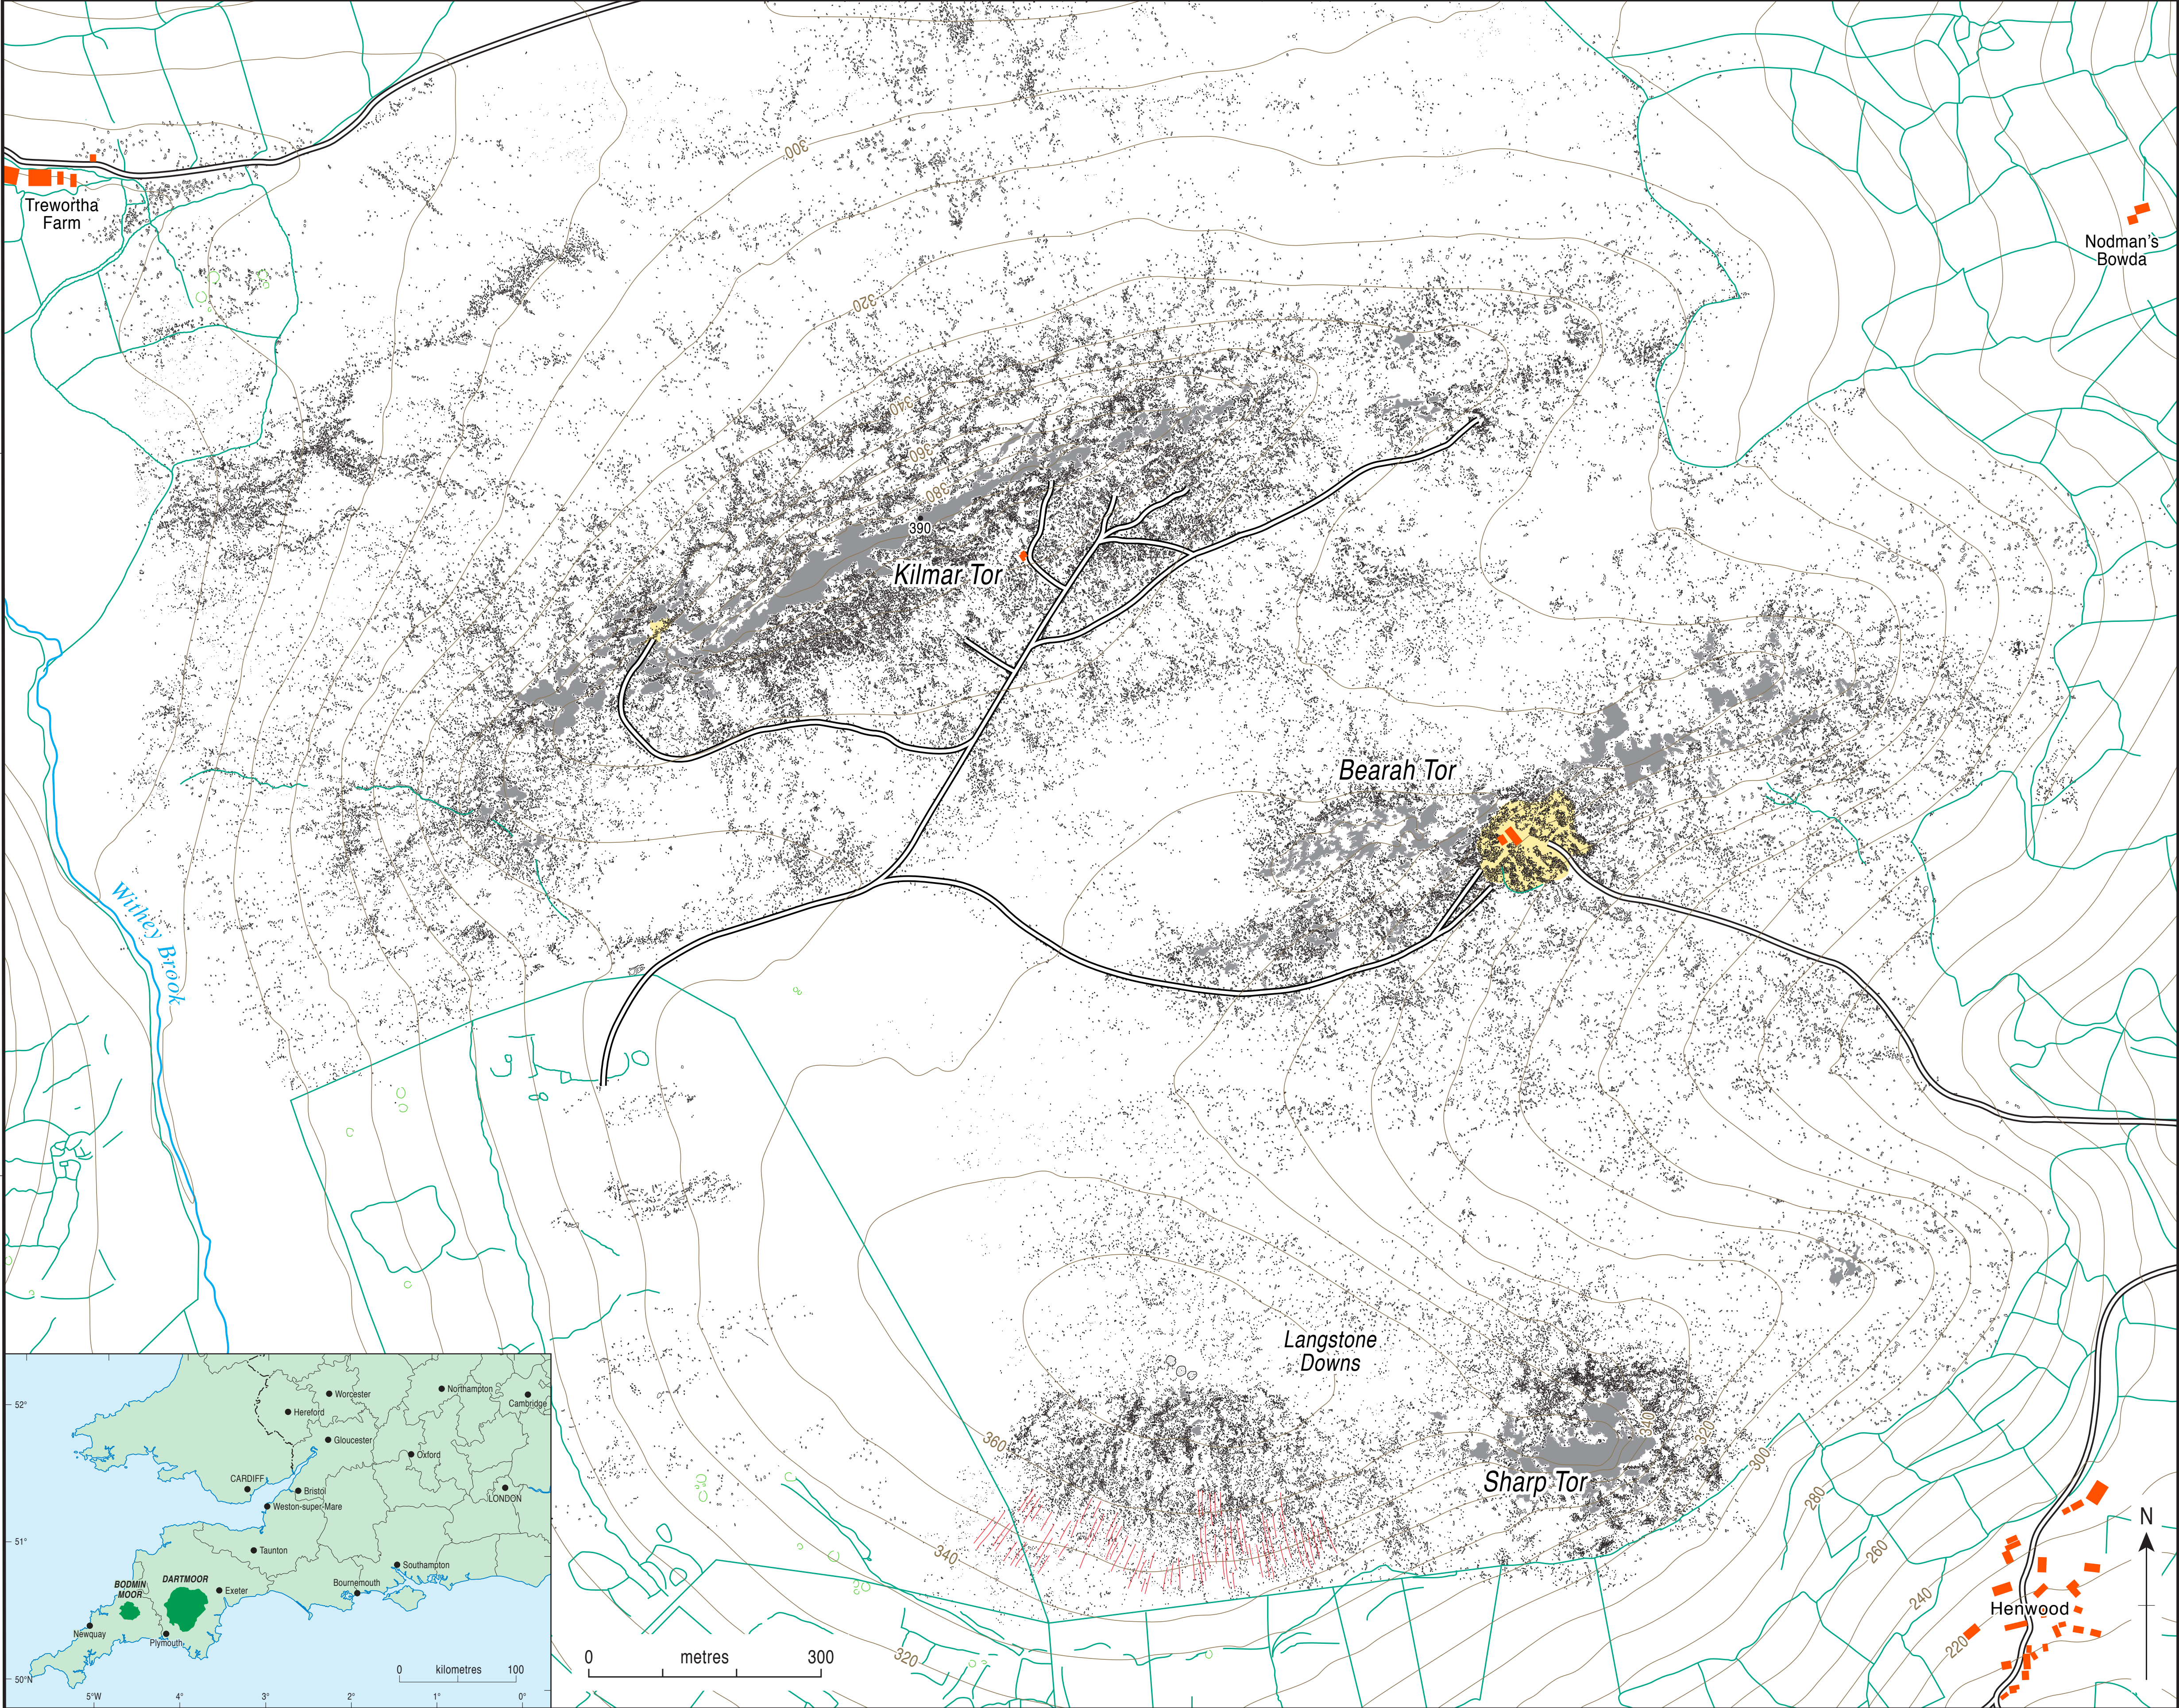

# PERIGLACIAL GEOMORPHOLOGY OF KILMAR TOR, BODMIN MOOR

DAVID J.A. EVANS, RIA KALYAN, and CHRIS ORTON

Department of Geography, Durham University, UK

-  Buildings
-  Quarry workings
-  Water body
-  Stream / river
-  Boulders (may include small bedrock outcrops)
-  Tors and large bedrock outcrops
-  Cairns
-  Patterned ground (stripes)
-  Field enclosures, walls and minor tracks
-  Walled enclosures
-  Track
-  Contours in metres

OS National Grid co-ordinates © Journal of Maps, 2016 Scale: 1:3335

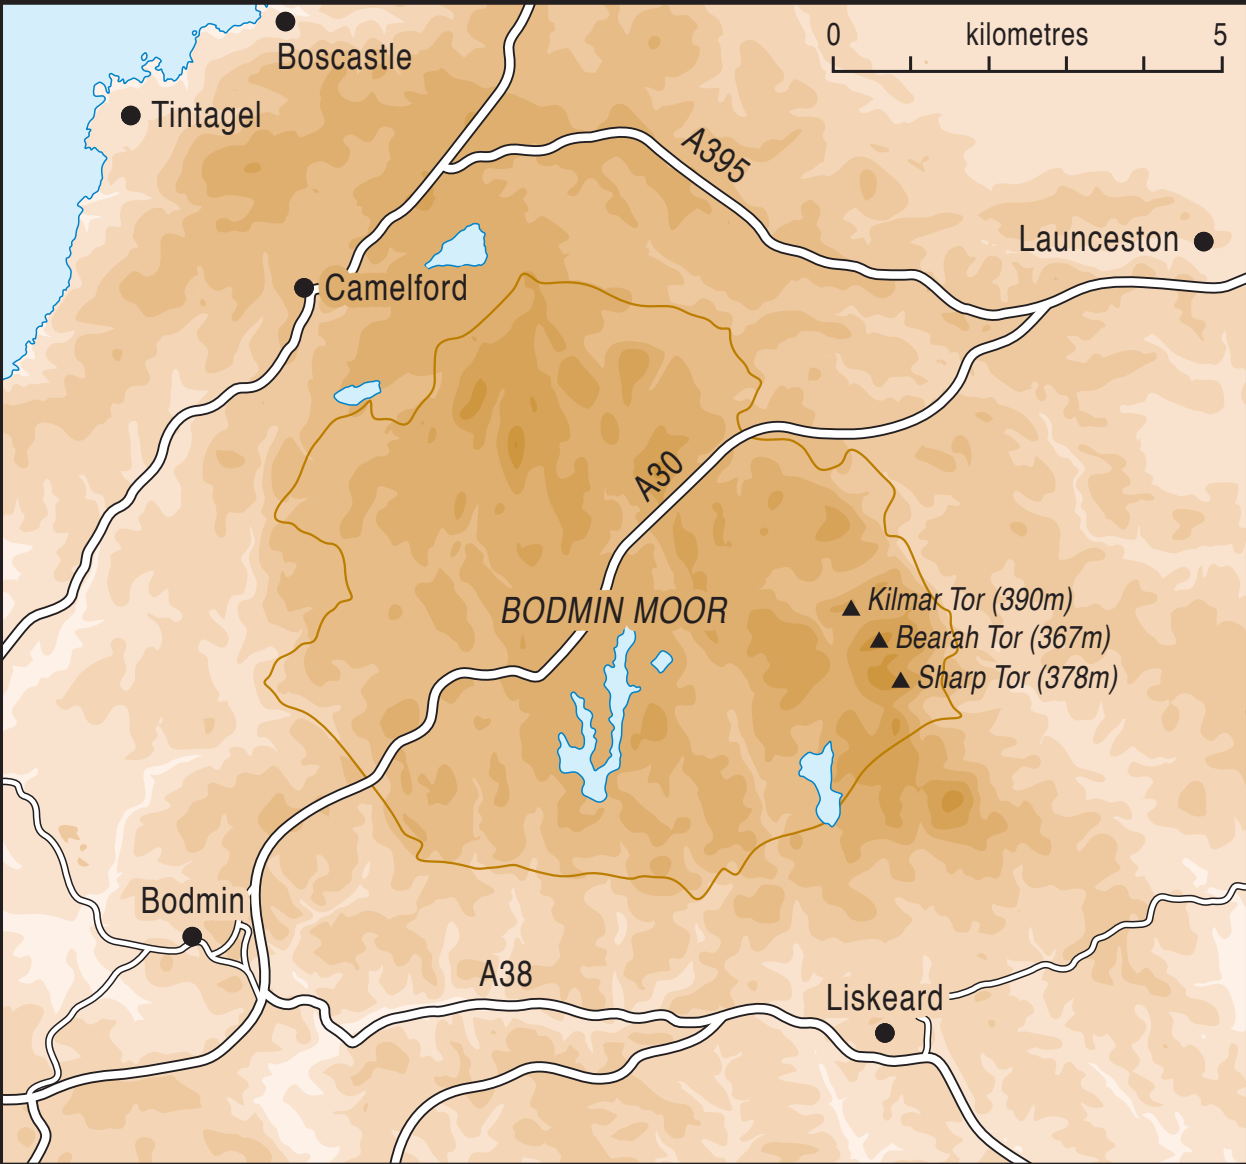

Supplement: Supplementary file 1 [file 1]
