# Supplementary material
Source: publisher figshare collection journal article supplement (https://tandf.figshare.com/articles/dataset/_/4829104)

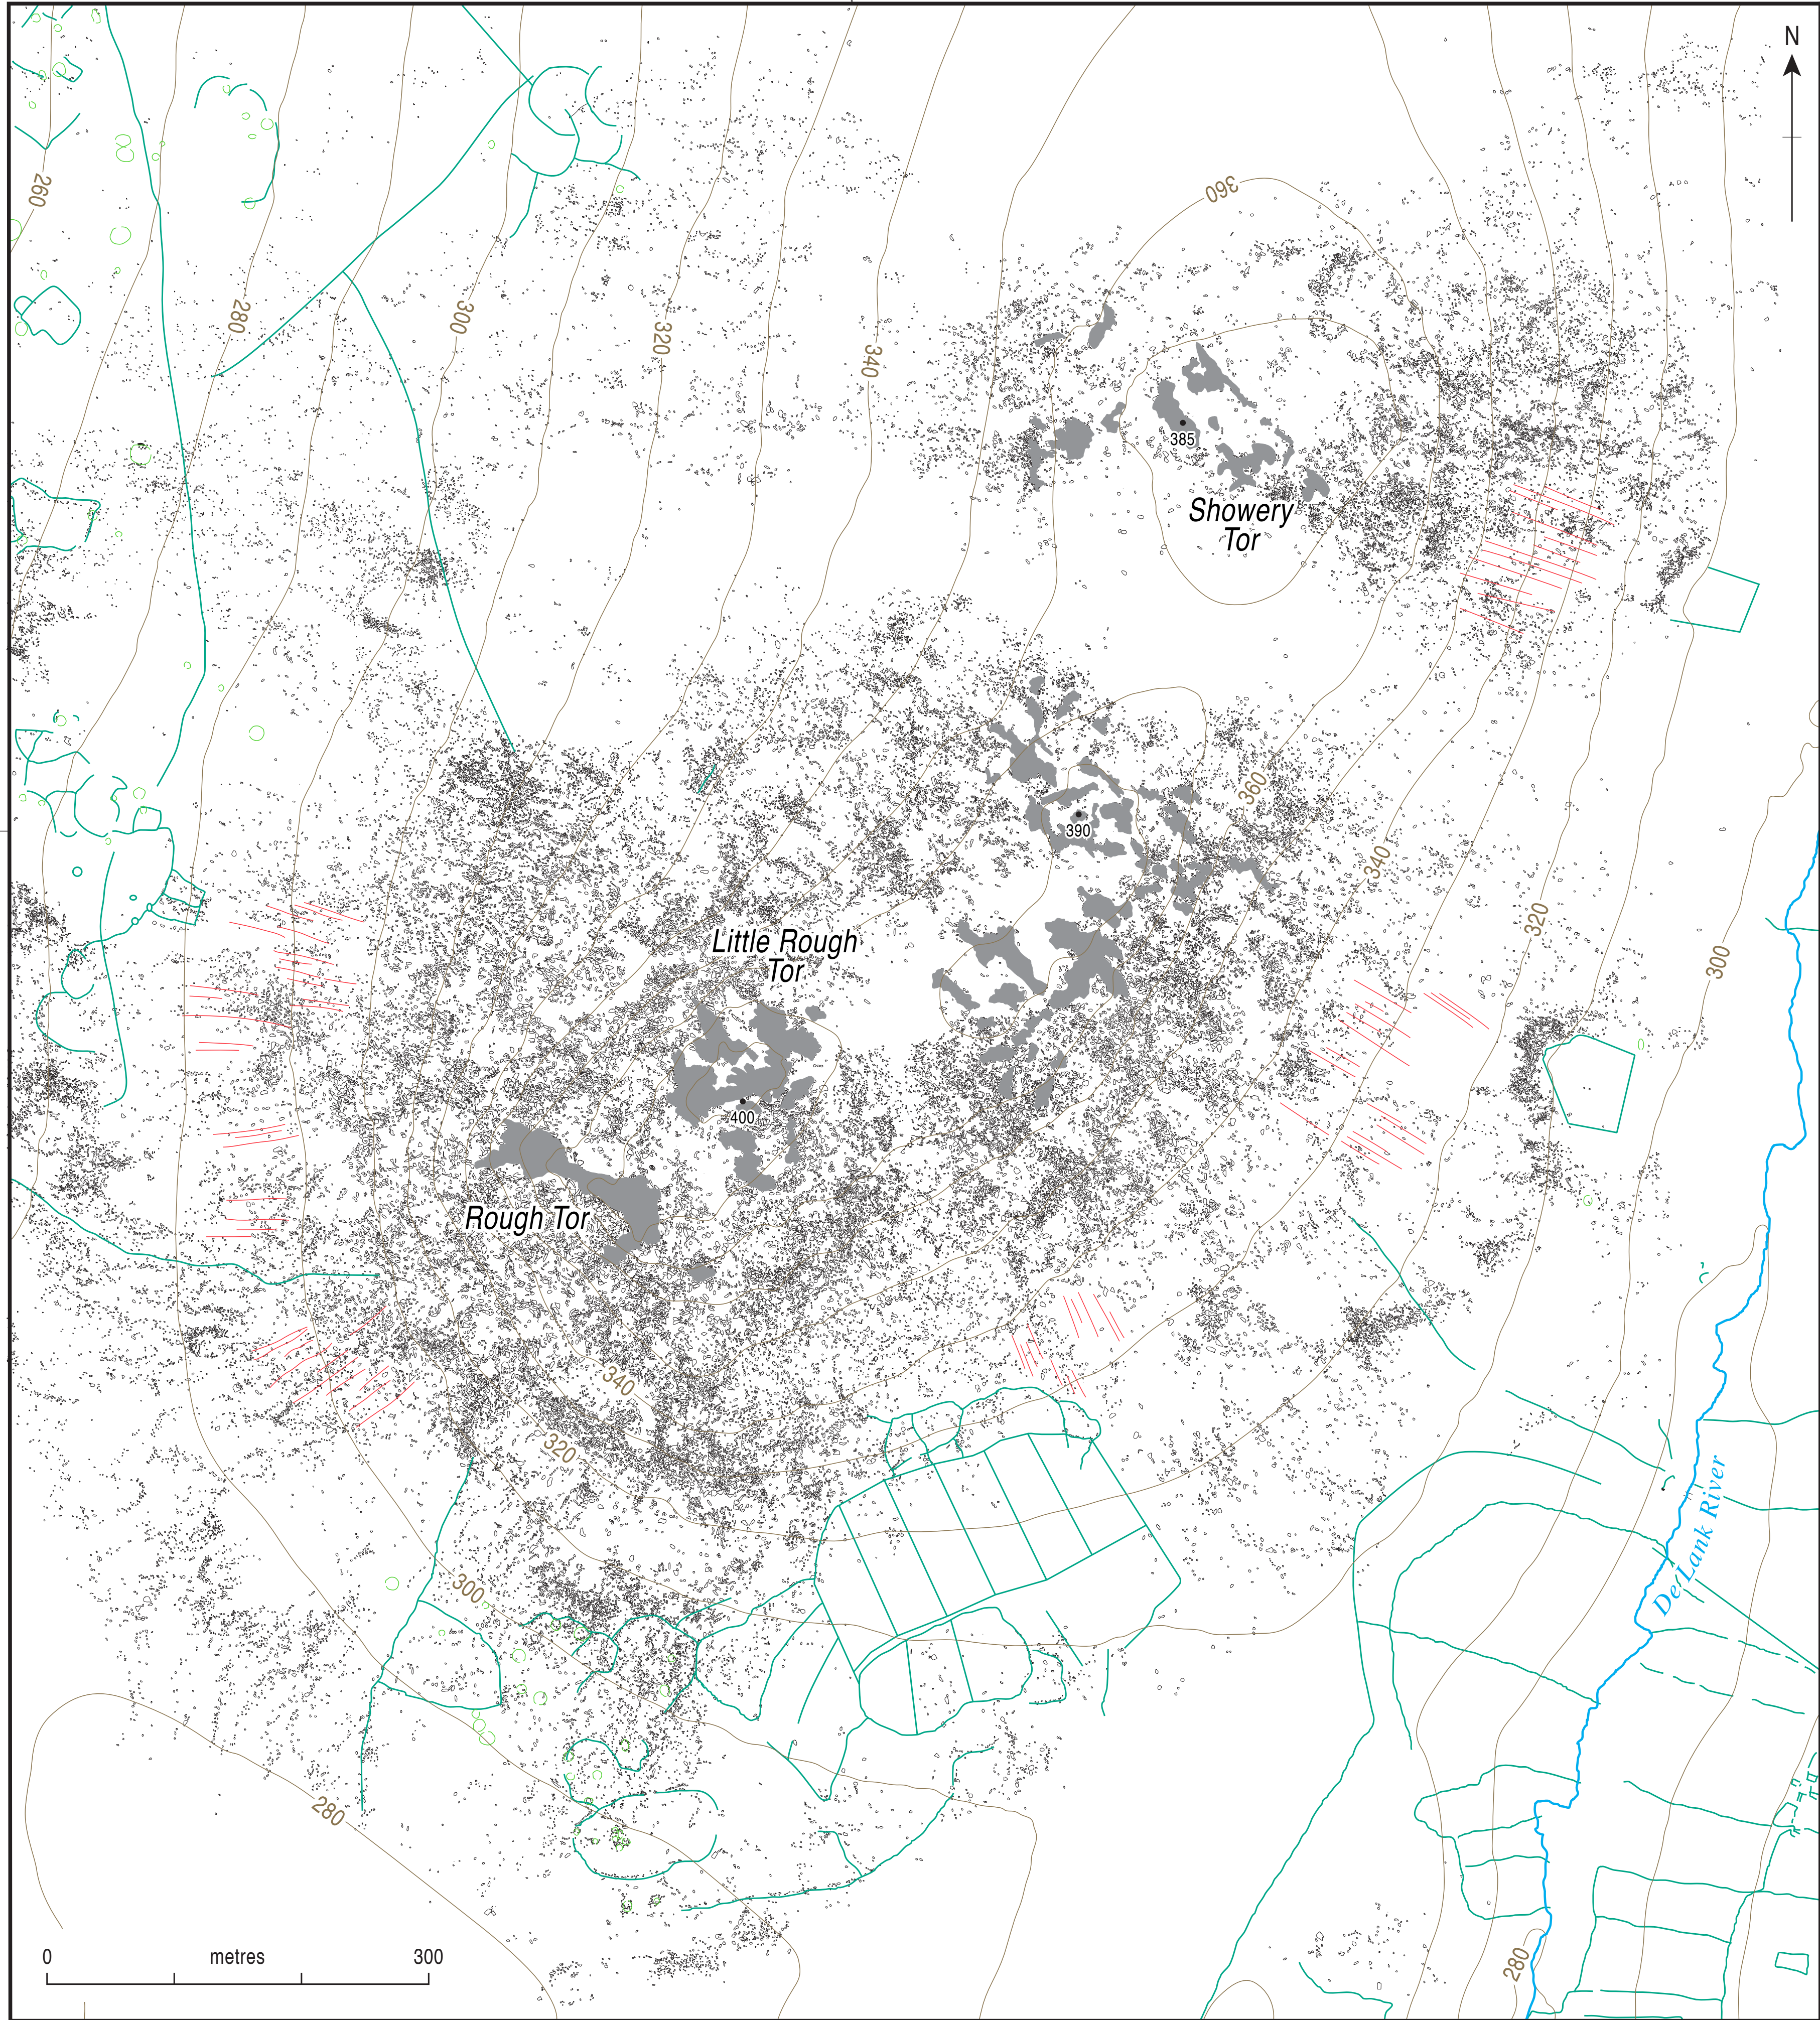

PERIGLACIAL GEOMORPHOLOGY OF  
ROUGH TOR, BODMIN MOOR

DAVID J.A. EVANS, RIA KALYAN, and CHRIS ORTON  
Department of Geography, Durham University, UK

- |                                               |                                        |
|-----------------------------------------------|----------------------------------------|
| Buildings                                     | Patterned ground (stripes)             |
| Water body                                    | Field enclosure walls and minor tracks |
| Stream / river                                | Walled enclosures                      |
| Boulders (may include small bedrock outcrops) | Road                                   |
| Tors and large bedrock outcrops               | Contours in metres                     |

OS National Grid co-ordinates      © Journal of Maps, 2016      Scale: 1:2175

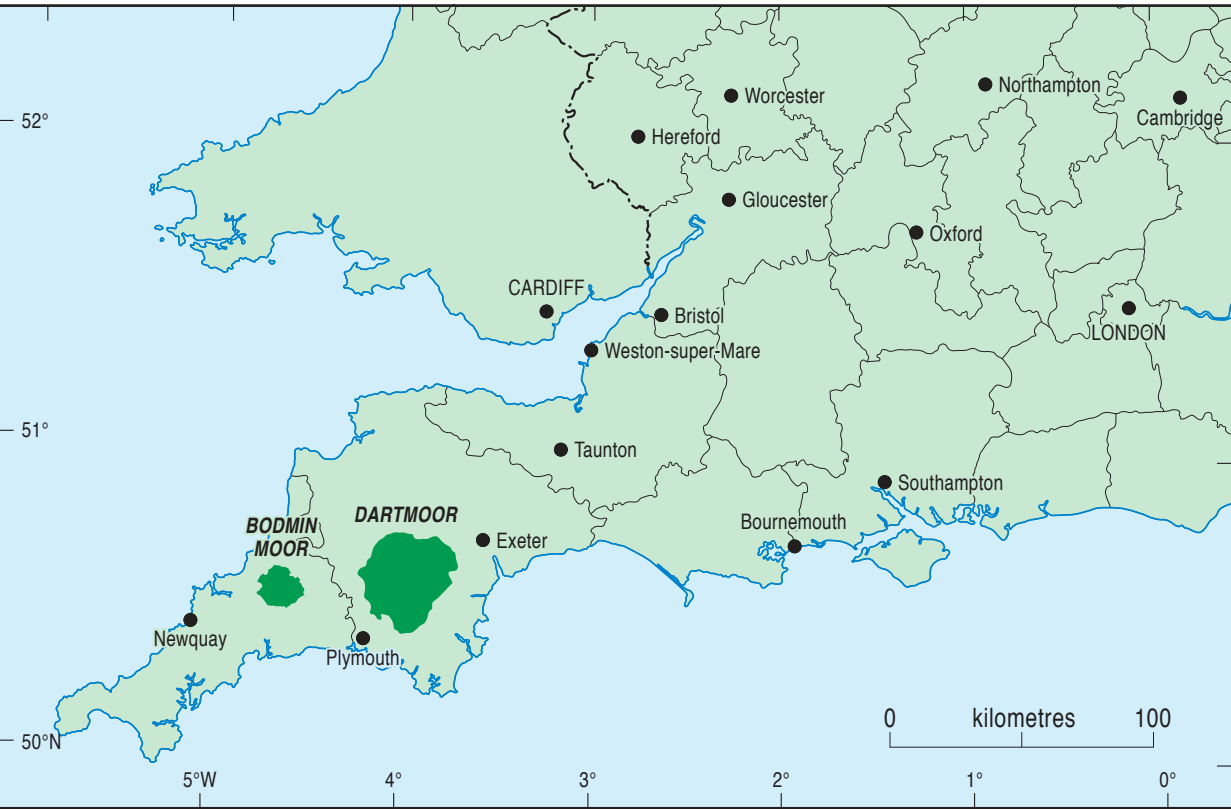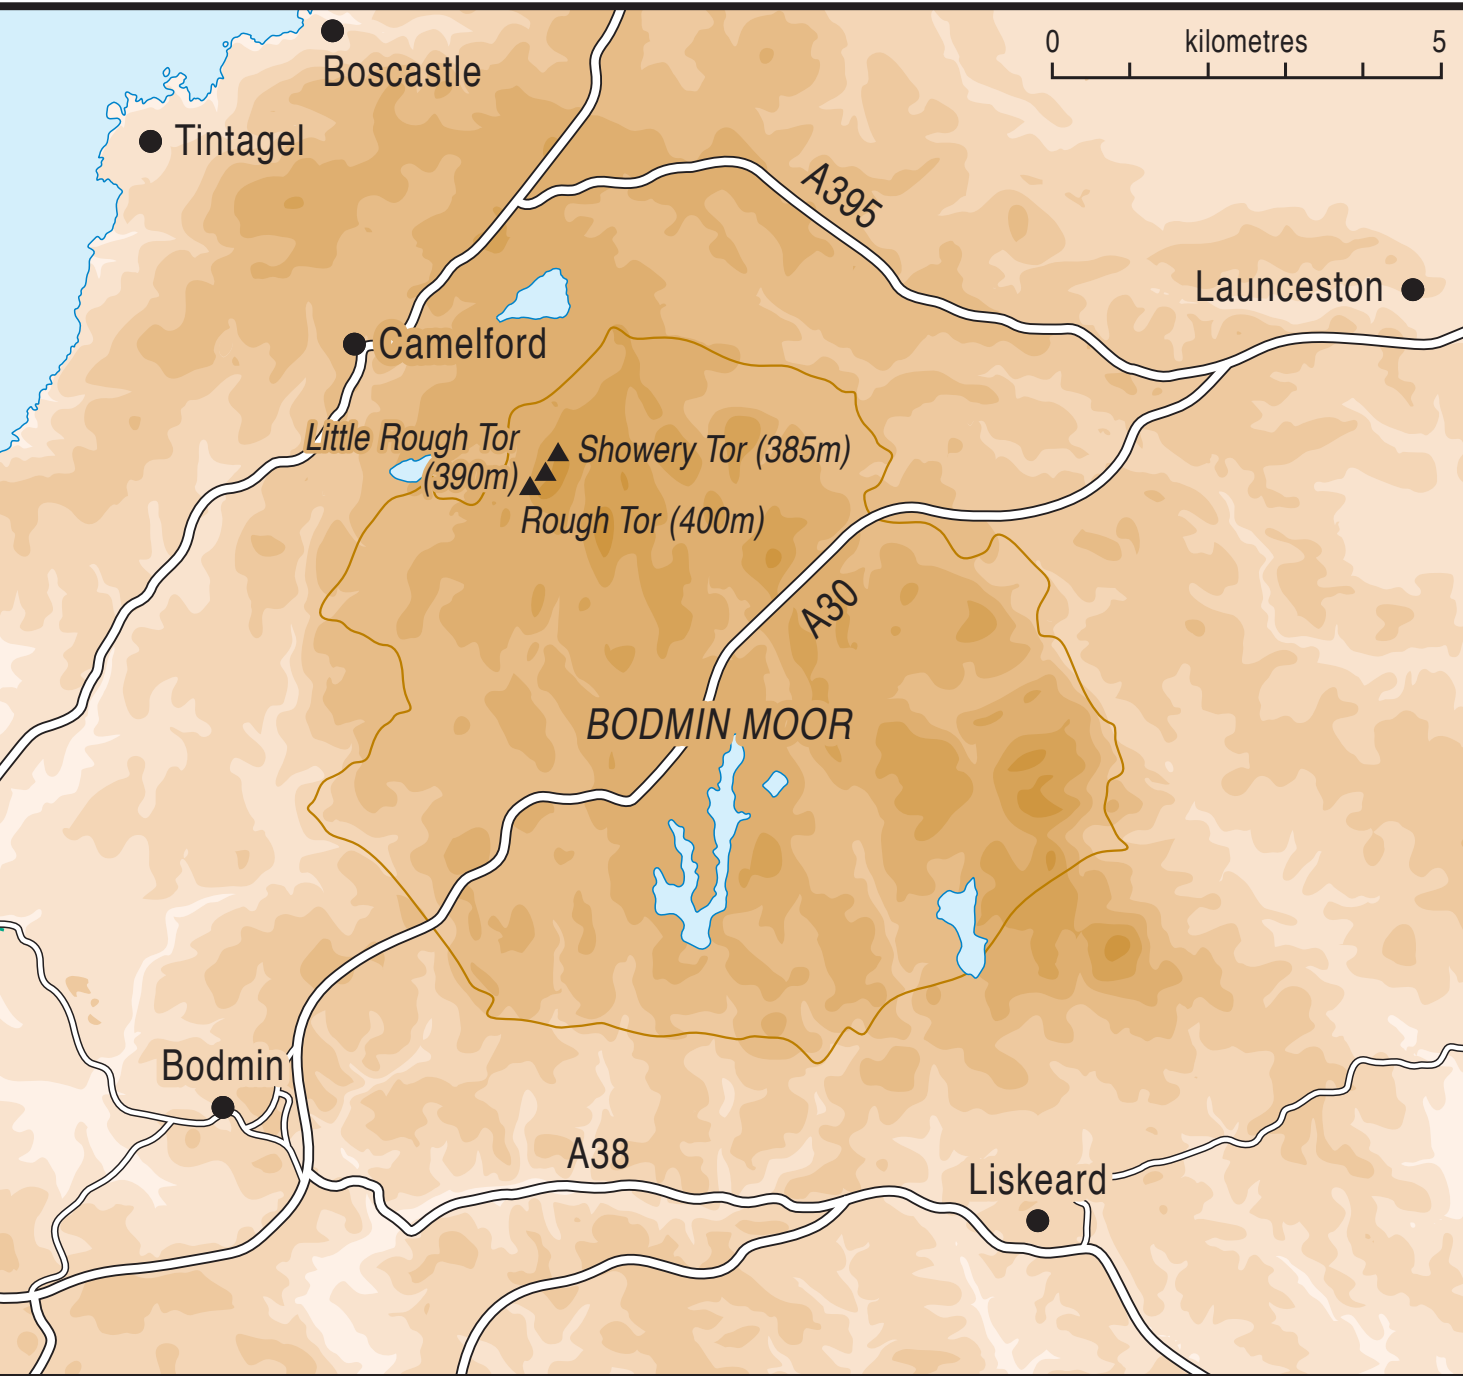

Supplement: Supplementary file 2 [file 1]
